# Supplementary material for: Molecular Characterization of a Novel Fusarivirus Infecting the Plant-pathogenic Fungus Alternaria Solani
Source: Research Square preprint supplement (doi:10.21203/rs.3.rs-216353/v1), 2021-02-19
Supplement: Supplementary file 1 [file 0b8506baa935ee9a361f2865.docx]

>AsFV1

TTTTGTGAACTGATGTTATCAGCCGGACTTCTGTCTTTTGTCCTGTTCCCAGCTGAACTTCTTGTTAAGTTCTTGCTGGTTCTTTTAGTGAGCTGCTTTGCAGCCCTCATTGTTTTAATTTTGGCACTCTGGCCAGTGGTTTTGTTGTCTTTCTATTTCTTTTTTCCCACCCCTTTGGTGGTTTTTGGAGTAGTAAGCAATTTGCACTTTCTGAGTGCTTTGATGTTTTTCCTTATTGTGTGGCGTACCCGCGCCTTCGTGCTAAGGGAAAGGCATCTCATTCACCTTGTGGGCCCAAAGCATGCTTTGTGGGTTGACAGCTCTGGGTTTATTGACAGCTGGAGGTCAAAACCTTTTTCATGGGTTGCTGCCGCGTTCGATCTTGATGATGTTCGCATATCAGGTCAGTTTCAAACGAAGTGGCTAAGCAAGTTCGTTGAACCAGAGTCCTATTCAAACTATTATGAGTTGACCAGTTTATGTTGGTCTCAATTCATTGTTGATGTTCATGATAGGTTTCTGCCTGGCCCTAGATTGGCTCTACTCGCCACTCTTTGGTCACTGAATTTGTTATTGGTGGCATATCTTCGCCCACTGAAGAAGATGGTCTCAATTTTCCGGTATTACGTTCTCTCCATATTCGCAATACTCAGCCTGAACCCTCAAGCTGTTTTGTTTTTGCTTGGGGCTGTTTACCATTTGCTGGTCAAGTTGATAAATTTCTTCAATCCAAAATTTGTGGAGTACTTAAAGTGGAACGTTGCAGCCATTGCAGTTTACATCACGAACGCATTTGTGGAGTACAATTTTGTTTCCAGGAAATGGCTGTCACGTGCAGGTTTCAGGCCATCACGCAAAACTGCGGGCATTCTGCCCGTTTTCACCAATTCTGTGGCTAAACTTGCTGTGGTTGTTGCTGATTTAGGCCTGCCCCATTATATAATGGGTGGCAAGCAAACATATGACGCTGATCACATTCAAGAAACCATGGACCTCATGCGGGAAGCTGGGTGGCCCATTAATGTCGAATTGGCCCCCCCGTCTAGGTTTGGGTCAGCTAGTGCATACGCTGATTGGCTTGTGAGTGGCACTGATTGGGAGCAAGGCATCCATAACCGGAAAGTGTATGTTGATCATGCTCTTGATCCACTCCGTGTGAAGGCTGTTGAGTTCCGACGCACGGAAGAATACCGTAGTAAGGAGAATGAATTGGAGTCCATAGCCCGCTACTTCAAAAGTCCCAAATATGATTACCCTGACCTAGATCTGGATGATGTTTGGTTGGTGGTAGGCGACATTTTCCGTTATTCTCGTATTACTCCTATGAACTACATCATCAAAATGTGGGAAAAGAAGTATGCGCTCGGTTCCTTCATGGTGGACCCTAACAATCCTAAGAAGAAACACTCACGGTGGAAATTTATAGCTTCCATGGGGTATGGCAACTTCAAGAAGCTGTGGAGGAGAACATTTGAAATTGCTCCCCAGTTTGCTCCAGTTGCGCATGTGTCTGTGAAGGATGAAGCCCTTCCTCCAAGAAAATACTTGGCAGACAAATTGCGCACAGTGGTTGGCAGCCCTATCGGCCAATATATTATGAGCACTGTTTGGAACTATTCACCTAACCATAACTTTAGGTGGACTTCTACCCCCATCAAGGTTGGAATGCCTCTTAATGGTTATTGGATGGACTATGTATACACTGCTCATTCTCGGTGCCAAATCCATTATGCTGGTGACATGAGTGAGTTCGATTCAACCTTATCTGGTCCTGTTTTGTCCTTAATAGCAGCAGTCAGAAAGAAAGGATTTGAATCGCATAAGGATCGTGACAGGATTGCTCGTCTTATTGATATAAACTATCAGCAAGTGGCTTCTCAGTTGTTGAACACAACCTCAACAGGGGACATTTATTCAAAAGGAACAGGTCTGACCACTGGGCATTCCTCCACTAGCATGGATAACAGTGTTGGTCTAGTGATTCTCTATCTTATGGCTTGGAAAGAAATCACTGGGCTATCAGCTCAAGAATTCAAGCACTACAATGAGCTGTCGTGTTTTGGTGATGACCACTTTTTCAGTTCGACTGGTAACAAGCCAGCAGCCTGGAATTTTAGGTCTATACAATCCGTTATGCGTAAGTGGGGGATAACCAACAACCTTGAGGCCACTGGGCCTTTGACAAATATTGGCTTTCTTAGCAAGTATGTTCGAGTGCCCACACCAGCCGATGTCGCTGATTTTCAGCGGGCTGGTGTCAAACAACCTCGATGGGCAGTCTTTCATGACAAAGAAAAACTCGTGGGAAAAATGGTTGCCAAGGTCAAATCTCAGGCCCCTGAGTACAGGCTGAAGAGACTTGTGTCTTACTTGTCATTAACTGCCCACCACAGGGACATTTATGACCAAGTGAACGGCATAATCAAAAGAACCACCACTTTTAAGCCTTACCTCAAATCCAAGACCAATCCAAAGGGCATTGTGGTCCCGTCATATGACAAAGTTGTCAGTGATTGGTACAAGCCTGATGCAAATTTCCCAGAAAACATGGTGGATGAGGTGGCCTCTGAGTTTGCTACAGATAAGACTGTGCTTGTTTATGGCAATCCTTCAGCATTGGATTCCATACTTGGGGCTCTTGCGCTTGTGCCTGACTTCGTCAATCCTGCTGTGTTTAACATGGGTTACATGGCTACATTGCAGAGTAAGCTCTTTAAATGTGTTTCATGGCCCATGCAACTACTTTCTTTGTCAAATGGCGCTGTCAGCCCTGCAGAACTGTCGCACATAGCTCGCAAAACTGTGTACGAATTTCTGGACCCTTCACTCACTACCTTCAGAGGGGATGAAGTCAACATCTCCACTCTGTTGGTCAGGCATTGGATCTTTTTGTTCTGGAAGACACAGCCATCATTTGTCAAGATGCCTCAACCGCCATTGGCTTCTATAGCTAGAAAAATTGCATCATTGCAGTTTTCCGTAAATGGGAAGGTTTTTCTTGATTCCAAAAGGTTCAACTTCCAGATTTTGGACCTACTTGTTGTTGCTTTGCTCGACTTTCTTTACATTCCAGATCTTTTTCCGTTTGCGTCTGTTATTGCTCTGCCTGATGTCAATTTATTGAGTGAGCAATTGACATTTTTCATTCAAAACTTGTTCTGGAGTGCCCTTCCTCCTAACTACGCAGATGTCACACCGCACCTTAGGTCACTCACCAGTAAAGATATATTGGTTATATCTGCTCCCACTGGGTCTGGCAAGAGCACCAGCTTGATCTCCCACATCAACAATGTTGTTGGGCACAAGTATAACAAAATCATAGTGGTTGAACCCAGGTCAGCCATTGTGAGGACAATTGTGCCTTACGTGAGAGTGTCTTTGTCATTGCCTGCTAGCGGTGCCACCAGCGGCATGACGCTTGACACTGAAGAGAAAATTTGGTATGTGACCGCTCAAGAGCTGTTGCTGCATCCTTATTGGTACAAGGGGCAGAATTCAAACAATCTTTTTGTTCTTGACGAGTGTCACATAGACGAGCCTGCCTATCAATTAGCGAAAACTGTCCTGTTGACATCCAAAGTCGATAAGATTTTCGTGTCCGCCACCCCTGACTACAGTCAATTTGGTGGGTCCAACGTTGTCGATGTGCCCCTTGTATCTGCGCGTCTGTTCAATGTTCATGTTTCAAATGTCATTAATGAAGACGTGTTGACAAAGAATGATTTTACGCGGCATTACGTGTCAGAGACACTGGCCGTGTTACAAAGTCGGCCTGCAGCTTCCGTATCACTGGTGTTTTGCACCACTCTTGGCATGTGTAAGCAGTTTTCGGAGTTGTGCCACAAACGAAATTTCATTTTGTCAAGTGGTACATCTGAGCTTCCAGACCTCACTGCCGGAACCGTCATTTTTACCACCAGCGTTGCAGATGTAGGAATAACGTTGCCCAATGTGGACTTTGTAGTCACCTCAGACATTGGATTCACTGTTGCACACAACCTCGATGAATCTAAGGAACGATACTACAAGTTAACTGAAGGTGACTTGAAGCAACGTGTGGGCAGAACAGGGCGTACGAACAATGGAGCCGCTGTTGTGTTTAGGACACCTAACGCCCGATTTGTCTCTGACTTGGCGACTGTACGCGAAAGCAGCTCTGTCTTTGACCTTATTGCGGGCGGAGTTCCATTGGACACAATATCTGAATTGAAGCCAAAAGAATTGAAAAAGTTGCTTGGCCTTGATGAAGTTCAGGACGCTCGGGCTGCTGCCACCCTGGAGCATAGTCTGTCAGAATTGAAAAGGTTTCAGTCCAACATACAGCCACTCCTTGAACAAAGGGCCAAATTGATGGAGATCGGCACGAATGATGGATCCCAGCCTCGCTACATTGACAGTGCAAGGATGGGTGTGCTTCTTCAATCCACCAATCTAGACTCCAGTTCAATTATACGAACTATTGTCAAACTGGCATCACATTTGGGCCTCAAACATACTGCTGCCGCAGATGAAGCTAATGCGCTTGATGTGTCCATTGAAGAGTGCAAGAAAGTGTTGCGTGACAATGGTTTGAATATTGATTTTGGTTATTCCTCTTTTCTATCTGCGGTGTCTCAAGGAGCACCAGGCATGAATGCCAACATAAATGCCTTCCTTGCCCGGAGACGCGGGAGAGGACGGTAGATGTCAATTAGGGGAAGTCACCTGAGGAGTACCCGCGAAACACTTTACAGGGTGTCGTGACTATGGATTCACACGATAATAATGCGTCGGTTTCGCCGAGCCGCACTCCGGGGTCTTACCCGGAGTCGCAACCTCCTCTTGTTGAACGGGCCCCGTCCGTCGTCTCAACTTCAGTTGCCGTCCGTGACGACATCAAAAATCTCATTTCCACGCAGCAATTCGAAAATTGCGCCTGGAAAGGCAACCCAGCATGGGTTATCCCTAAAGCCAAATGGGCTACAATCCAAACTCAATTGGATCAAGTCATTGGCGAAGGGAAAACTACTGTCGGAGCTGCAGAGTTGGCTGAGTTACAACGTGAGCTCAGTTTGCTTAGGCTGAAGGTAAATGCCTTTGAGTCTGAAAAAGAGCGATATGAGTTTGCCTCTAGCAATCTCATGAAGGCTCTAAATACTGCCAAGGCCAATGAGGCTAAGGCAAGGTCAGAGGCTGATGCAGCCTTGAAAGAGCTTGGCACTGCAACTGCAGGCTTGAAATCAAGCCTCCAGGCAGCACAAGCCCTGAAGGCTGATTTTGAGACGGCCTTACAGAAAGCCAAGAGGGAAGGCACTGCAGAAGATGTTTCTAAGCTCCGTGAGGACAAGAAACGTCTATCTGAAGAAATTACCACACTCAACAATTCCCTCCAACAGGTTAATTCTGACCGAAAGGAAGTTGAGTCCAAGTTGAAGCGATTTGAGCGCCAGTCTCTGGAGTTGACTAATGAGCTTAACCTTGAAAAGTCTCGTTACACAATTTCCAACCCCCAGCAAGGGCAGACATTTGCTGAAAAAGCTGCCGCCATGGGCACTGCAAGTGTCAATTTGGCCAACGCTGCTTACAGCAATCTTTCTGCTCTTGCTCGGGACAGATTCTCGCACGTCGAATCTGATCCAACCAAGGATGAGAAGGACACCGTGTTTTGGTTGAAGGCAACATTTGATGCCACAAAGCACGCAGTGTACCGCCCTTACAAAACCATCTTTGATGGTTTAGGCGGCGACATCAGGTCAATGAGTGTGCGAAGCCGCAAGCTATTCGACCCTTTTCTGATTGCTGTCCGTGATTCACTCTTGCCAACTGGACGTCCATTGACTCTGGATGAGATGACAAGTATGATATCAGGCATTGAGCTCAAGGATATAGAGCTTAACAAAGCATATCGCGACAAGGGGTACAGGACAGCGCAAGACCTTGACGATGTTGGCCTTGCTATTGGCTCGCCTGATGCTGCTGGGATTCCCCCTAGGACTAAGTCCTTTGGGAAGAAACGCAGGAACTCAGACCCTGCTGTCAAAGCCACTGGTGAAAAATTGGTCCTTCGCCACCCTGATCTTCGTCCTTCAGACGATGAAGACGGTCCATCTTCTGGGGGTGGCAATCACTCCAAAAAGGGACACCAGGAAAACAGTTACTACCAAAAGGTTAGAGACTGGTTTCATCTGAATTTTGACAAGATGAATTCCCGAGTACGACGCGCACTCAAGAAAAGTCCTGCAAGAATGAAGCGTTACTATTCTCTTGCATACGGTGGATTTTTCAAGCGATTTTTGTTGGTCCCCTATAGTTGGTACCTTTGGGCCTTTCCATGAAGTGGTACACCCCATTGATTTATGGGTGGAGCTGGGACAAGGACGAAACCACAGGTAATTATTCCTATGGCACTGTCCCGTACTATTTTCAGGAAGGGCTCCAGATCGCAAAACATTACCTGGTGAGGAAACCAGTTTCTTTCACCAAGAAAATTGTCCCCCTTGTCAAGCAAGGGTATAATCATTTCAGAAAGAATTTCAGGCTTGCACATCTGGCCCTAACTAGTGCCGCGGCGCTAGTCGGTTATTTTGTGTTAGTCGGAGTTACTTGGAACATTGCTTTCAAGATACTGAAGTGGTTCAAATTTTTCTAAATTTTACTGTTATAACGGGTGAAGAACTATGGTGGTCGACCGATAGAAGACCCTTCTCCCTTTCCTGCAGTGTGGGGGGAAGTGCAACCAGCAGGGCCTGATGCTTCGACATGTTTCAATTTCGTTGTTCATTGAACAATGATGTGGTCACATATCGATGCATCATACCTTGCTTGCTTGTACTTCCTTCCATGAAAAGGAAAAAAAAAAAAAAAAA
